# Supplementary material for: Precise Authenticity of Quinoa, Coix Seed, Wild Rice and Chickpea Components Using Optimized TaqMan Real-Time PCR
Source: MDPI journal article supplement (doi:10.3390/foods12040852), 2023-02-16
Supplement: s1 [file s1]

# Supporting Information

*Article*

## Precise and rapid authenticity of functional food components using optimized TaqMan real-time quantitative PCR

Qiuyue Zheng<sup>1,†</sup>, Xinying Yin<sup>1,†</sup>, Aifu Yang<sup>2</sup>, Ning Yu<sup>3</sup>, Ranran Xing<sup>3</sup>, Ying Chen<sup>3\*</sup>, Ruijie Deng<sup>4</sup>, Jijuan Cao<sup>1\*</sup>

<sup>1</sup>Key Laboratory of Biotechnology and Bioresources Utilization of Ministry of Education,

College of Life Science, Dalian Minzu University, Dalian 116600, China

<sup>2</sup>Technology Center of Dalian Customs District, Dalian 116001, China

<sup>3</sup>Chinese Academy of Inspection and Quarantine, Beijing 322001, China

<sup>4</sup>College of Biomass Science and Engineering, Healthy Food Evaluation Research Center, Sichuan University, Chengdu 610065, China

<sup>†</sup> These authors contributed equally to this work.

\* Correspondence: chenyingcaiq@163.com (Y.C.); caojijuan@dlmu.edu.cn (J.C.)



**Table S1.** Conditions of robustness test as an orthogonal design <sup>a</sup>

| Factors                         | Combination |        |           |           |           |           |           |        | Control   |
|---------------------------------|-------------|--------|-----------|-----------|-----------|-----------|-----------|--------|-----------|
|                                 | 1           | 2      | 3         | 4         | 5         | 6         | 7         | 8      |           |
| qPCR instrument                 | A           | A      | A         | A         | B         | B         | B         | B      | B         |
| qPCR reagent                    | X           | X      | Y         | Y         | X         | X         | Y         | Y      | X         |
| Primer concentration (pmol/μL)  | Unchanged   | -20%   | Unchanged | -20%      | Unchanged | -20%      | Unchanged | -20%   | Unchanged |
| Probe concentration (pmol/μL)   | Unchanged   | -20%   | -20%      | Unchanged | -20%      | Unchanged | Unchanged | -20%   | Unchanged |
| Volume of reaction mixture (2×) | 13.5 μL     | 13.5μL | 11.5 μL   | 11.5μL    | 13.5 μL   | 13.5μL    | 11.5 μL   | 11.5μL | Unchanged |
| Annealing temperature           | +1°C        | - 1°C  | +1°C      | - 1°C     | - 1°C     | +1°C      | - 1°C     | +1°C   | Unchanged |

<sup>a</sup> A : LightCycler® 480 II Real-Time Fluorescence PCR (Roche, Germany). B: QuantStudio6 Flex Real-Time Fluorescence PCR (ABI, USA). X: Premix Ex Taq™ Probe qPCR, RR390 A, TAKARA, China. Y: GoTaq qPCR Master Mix, A6101, Promega, USA.

**Table S2.** qPCR specific analysis results of quinoa, coix seed, wild rice and chickpea

| Samples             |                                         | Average Ct value |               |                  |                 |             |
|---------------------|-----------------------------------------|------------------|---------------|------------------|-----------------|-------------|
| Common name         | Latin name                              | wild rice system | quinoa system | coix seed system | chickpea system | 18S rRNA    |
| coix seed           | <i>Coix lacryma-jobi</i>                | negative         | negative      | 22.2 ± 1.02      | negative        | 18.8 ± 0.08 |
| wild rice           | <i>Zizania latifolia</i>                | 22.9 ± 0.10      | negative      | negative         | negative        | 17.4 ± 0.07 |
| wild rice           | <i>Zizania palustris</i>                | 23.7 ± 0.69      | negative      | negative         | negative        | 17.8 ± 0.06 |
| wild rice           | <i>Zizania aquatica</i>                 | 25.4 ± 0.60      | negative      | negative         | negative        | 17.3 ± 0.04 |
| wild rice           | <i>Zizania texana</i>                   | 21.9 ± 0.12      | negative      | negative         | negative        | 17.7 ± 0.07 |
| quinoa (white)      | <i>Chenopodium quinoa</i> Willd.        | negative         | 26.2 ± 1.13   | negative         | negative        | 13.6 ± 0.13 |
| quinoa (red)        | <i>Chenopodium quinoa</i> Willd.        | negative         | 26.1 ± 1.12   | negative         | negative        | 15.7 ± 0.07 |
| quinoa (black)      | <i>Chenopodium quinoa</i> Willd.        | negative         | 26.4 ± 1.14   | negative         | negative        | 14.1 ± 0.11 |
| chickpea            | <i>Cicer arietinum</i> L.               | negative         | negative      | negative         | 24.3 ± 0.79     | 16.3 ± 1.98 |
| sorghum rice        | <i>Sorghum</i>                          | negative         | negative      | negative         | negative        | 16.5 ± 0.22 |
| sugarcane           | <i>Saccharum officin</i>                | negative         | negative      | negative         | negative        | 18.4 ± 0.14 |
| pseudo sorghum rice | <i>Sorghum halepense</i> (L.) Pers      | negative         | negative      | negative         | negative        | 18.4 ± 0.15 |
| corn                | <i>Zea mays</i> L.                      | negative         | negative      | negative         | negative        | 15.8 ± 0.11 |
| Chia seed           | <i>Salvia Hispanica</i> L.              | negative         | negative      | negative         | negative        | 13.9 ± 0.21 |
| red rice            | <i>Lpomoa batatas</i> (L.)              | negative         | negative      | negative         | negative        | 17.7 ± 0.08 |
| black kerneled rice | <i>Semen Trigone</i>                    | negative         | negative      | negative         | negative        | 14.8 ± 1.06 |
| rice                | <i>Oryza sativa</i>                     | negative         | negative      | negative         | negative        | 14.5 ± 0.11 |
| coarse rice         | <i>Panicum miliaceum</i>                | negative         | negative      | negative         | negative        | 14.8 ± 0.07 |
| Rye                 | <i>Secale cereale</i> L.                | negative         | negative      | negative         | negative        | 13.9 ± 2.33 |
| buckwheat           | <i>Fagopyrum esculentum</i> Moench.     | negative         | negative      | negative         | negative        | 15.0 ± 0.21 |
| tartary buckwheat   | <i>Fagopyrum tataricum</i> (L.) Gaertn. | negative         | negative      | negative         | negative        | 16.6 ± 0.14 |
| oats                | <i>Avena sativa</i> L.                  | negative         | negative      | negative         | negative        | 15.1 ± 0.37 |
| barley              | <i>Hordeum vulgare</i> L.               | negative         | negative      | negative         | negative        | 16.4 ± 0.10 |
| wheat               | <i>Triticum aestivum</i> L.             | negative         | negative      | negative         | negative        | 15.1 ± 0.05 |
| Semen sesami nigrum | <i>Sesamum radiatum</i>                 | negative         | negative      | negative         | negative        | 16.6 ± 0.11 |

|                  |                                                        |          |          |          |          |             |
|------------------|--------------------------------------------------------|----------|----------|----------|----------|-------------|
| black soya bean  | <i>Glycine max (L.) merr.</i>                          | negative | negative | negative | negative | 14.1 ± 0.14 |
| kidney bean      | <i>Phaseolus vulgaris</i>                              | negative | negative | negative | negative | 14.7 ± 0.08 |
| soybean          | <i>Glycine max (Linn.) Merr.</i>                       | negative | negative | negative | negative | 14.8 ± 0.15 |
| Mung bean        | <i>Vigna radiata (Linn.) Wilczek.</i>                  | negative | negative | negative | negative | 14.4 ± 0.07 |
| hyacinth bean    | <i>Lablab purpureus (Linn.) Sweet</i>                  | negative | negative | negative | negative | 12.8 ± 0.02 |
| pea              | <i>Pisum sativum L.</i>                                | negative | negative | negative | negative | 15.7 ± 0.05 |
| red bean         | <i>Vigna angularis</i>                                 | negative | negative | negative | negative | 12.5 ± 0.17 |
| agaric           | <i>Auricularia auricula (L.ex Hook.) Unegativewood</i> | negative | negative | negative | negative | 14.8 ± 0.19 |
| Xianggu mushroom | <i>Lentinus edodes (Berkeley) Singer</i>               | negative | negative | negative | negative | 14.6 ± 0.15 |

**Table S3.** linear equation of qPCR assay of quinoa, coix seed, wild rice anegative chickpea

| Event                      | Linear equation                       | R <sup>2</sup> | Efficiency (E)% |
|----------------------------|---------------------------------------|----------------|-----------------|
| quinoa source component    | $y = 27.16 - 3.27 \text{ Log}_{10} X$ | 0.9923         | 102.22%         |
| coix seed source component | $y = 26.59 - 3.35 \text{ Log}_{10} X$ | 0.9984         | 98.74%          |
| wild rice source component | $y = 23.67 - 3.40 \text{ Log}_{10} X$ | 0.9965         | 96.97%          |
| chickpea source component  | $y = 26.82 - 3.38 \text{ Log}_{10} X$ | 0.9989         | 97.80%          |

**Table S4.** Robustness results of quinoa, coix seed, wild rice and chickpea systems

| Methods   | Ct value of combination |              |              |              |              |              |              |              |              |              | RSD (%) |
|-----------|-------------------------|--------------|--------------|--------------|--------------|--------------|--------------|--------------|--------------|--------------|---------|
|           | 1                       | 2            | 3            | 4            | 5            | 6            | 7            | 8            | Mean         | Control      |         |
| Quinoa    | 35.32 ± 0.11            | 35.43 ± 0.15 | 35.45 ± 0.11 | 35.38 ± 0.15 | 35.34 ± 0.04 | 35.36 ± 0.12 | 35.42 ± 0.15 | 35.47 ± 0.14 | 35.40 ± 0.05 | 35.27 ± 0.05 | 0.14    |
| Coix seed | 35.89 ± 0.14            | 35.92 ± 0.12 | 35.99 ± 0.11 | 35.81 ± 0.16 | 35.94 ± 0.16 | 35.92 ± 0.14 | 36.02 ± 0.14 | 35.96 ± 0.13 | 35.93 ± 0.06 | 35.93 ± 0.08 | 0.17    |
| Wild rice | 32.73 ± 0.14            | 32.72 ± 0.22 | 32.66 ± 0.15 | 32.74 ± 0.20 | 33.05 ± 0.18 | 33.01 ± 0.20 | 32.97 ± 0.11 | 32.99 ± 0.11 | 32.86 ± 0.16 | 32.82 ± 0.07 | 0.49    |
| Chickpea  | 35.67 ± 0.10            | 35.67 ± 0.08 | 35.80 ± 0.12 | 35.81 ± 0.11 | 36.27 ± 0.52 | 36.00 ± 0.14 | 36.01 ± 0.19 | 36.05 ± 0.17 | 35.91 ± 0.21 | 35.77 ± 0.05 | 0.58    |

**Table S5.** Detection of commercial samples containing quinoa, coix seed, wild rice and chickpea

| Sample No. | Sample name                                    | qPCR analysis results (Ct value) |             |             |             |
|------------|------------------------------------------------|----------------------------------|-------------|-------------|-------------|
|            |                                                | Quinoa                           | Coix seed   | Wild rice   | Chickpea    |
| 1          | Coix seed (100%)                               | negative                         | 23.2 ± 0.08 | negative    | negative    |
| 2          | Red bean coix seed Yam powder                  | negative                         | 32.3 ± 0.12 | negative    | negative    |
| 3          | Coix seed red bean Meal replacement cake       | negative                         | negative    | negative    | negative    |
| 4          | Red bean coix seed pellet                      | negative                         | negative    | negative    | negative    |
| 5          | Red bean coix seed Poria cocos cream           | negative                         | 36.2 ± 0.11 | negative    | negative    |
| 6          | Red bean coix seed steamed bun                 | negative                         | 36.0 ± 0.04 | negative    | negative    |
| 7          | Red bean coix seed tea                         | negative                         | 33.4 ± 0.14 | negative    | negative    |
| 8          | Red bean coix seed Soft Canegativey            | negative                         | 35.8 ± 0.21 | negative    | negative    |
| 9          | Coix seed noodle                               | negative                         | 37.5 ± 0.12 | negative    | negative    |
| 10         | Red bean coix seed Poria cocos tea             | negative                         | 32.7 ± 0.10 | negative    | negative    |
| 11         | Chickpea (100%)                                | negative                         | negative    | negative    | 24.6 ± 0.09 |
| 12         | Chickpea noodle (30%)                          | negative                         | negative    | negative    | 27.3 ± 0.30 |
| 13         | Steamed and ready to eat chickpea chips (100%) | negative                         | negative    | negative    | 24.2 ± 0.08 |
| 14         | Refined pure raw chickpea leather (100%)       | negative                         | negative    | negative    | 30.6 ± 0.19 |
| 15         | Canned Turkish chickpea (100%)                 | negative                         | negative    | negative    | 37.8 ± 0.07 |
| 16         | Canned chickpea (100%)                         | negative                         | negative    | negative    | 31.3 ± 0.15 |
| 17         | Fried chickpea (100%)                          | negative                         | negative    | negative    | 36.9 ± 0.21 |
| 18         | Quinoa Bolivia imports quinoa (100%)           | 26.0 ± 0.17                      | negative    | negative    | negative    |
| 19         | Qinghai 3 colors quinoa (100%)                 | 26.8 ± 0.22                      | negative    | negative    | negative    |
| 20         | Quinoa soda biscuit (3.2%)                     | negative                         | negative    | negative    | negative    |
| 21         | Quinoa wheat Germ Mixed Cereal (2%)            | 36.7 ± 0.57                      | negative    | negative    | negative    |
| 22         | Quinoa powder (100%)                           | 26.2 ± 0.08                      | negative    | negative    | negative    |
| 23         | Canada No.1 Ice lake wild rice (100%)          | negative                         | negative    | 20.7 ± 0.14 | negative    |
| 24         | Wild rice powder (100%)                        | negative                         | negative    | 22.1 ± 0.04 | negative    |
